# Supplementary material
Source: Springer Nature journal article supplement (https://www.springermedizin.de/resource/supplementary/12950_2013_360_MOESM2_ESM.pdf/9557658)

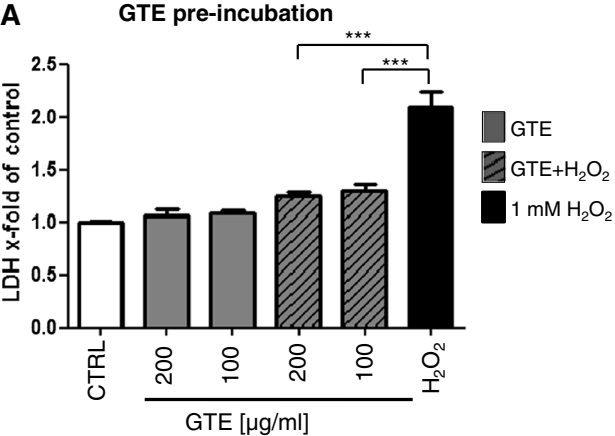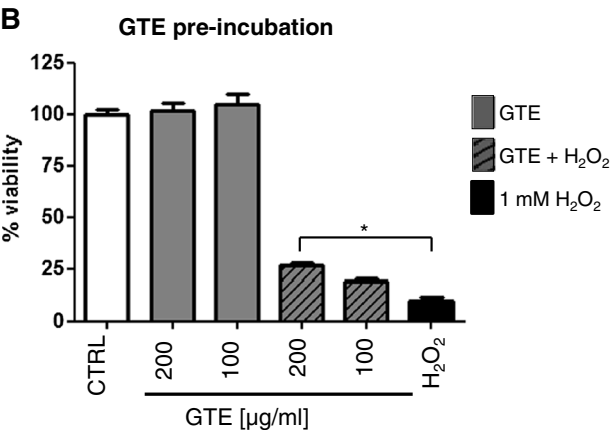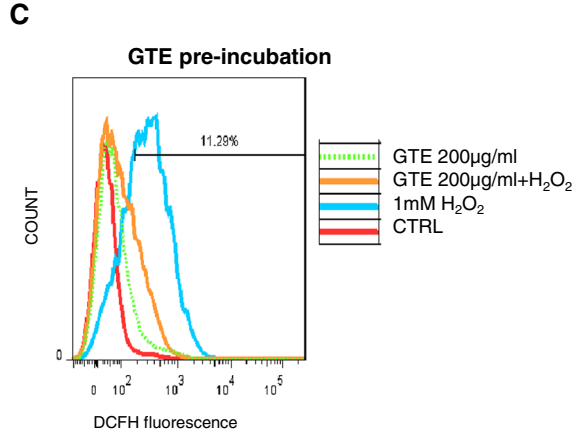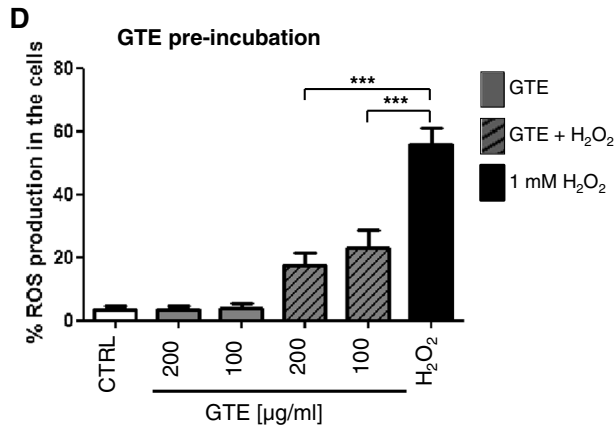

Supplement: MOESM2 [file 9557658]
